# Supplementary material for: A common molecular signature of intestinal-type gastric carcinoma indicates processes related to gastric carcinogenesis
Source: PubMed Central journal article supplement (PMC5800908; doi:10.18632/oncotarget.23670), 2017-12-27
Supplement: oncotarget-09-7359-s001.pdf [file oncotarget-09-7359-s001.pdf]

## **A common molecular signature of intestinal-type gastric carcinoma indicates processes related to gastric carcinogenesis**

### **SUPPLEMENTARY MATERIALS**

**Supplementary Table 1: List of the 57 differentially expressed genes identified by chip array assay.** See Supplementary\_Table\_1
